# Supplementary material for: The local burden of disease during the first wave of the COVID-19 epidemic in England: estimation using different data sources from changing surveillance practices
Source: Springer Nature journal article supplement (doi:10.1186/s12889-022-13069-0), 2022-04-11

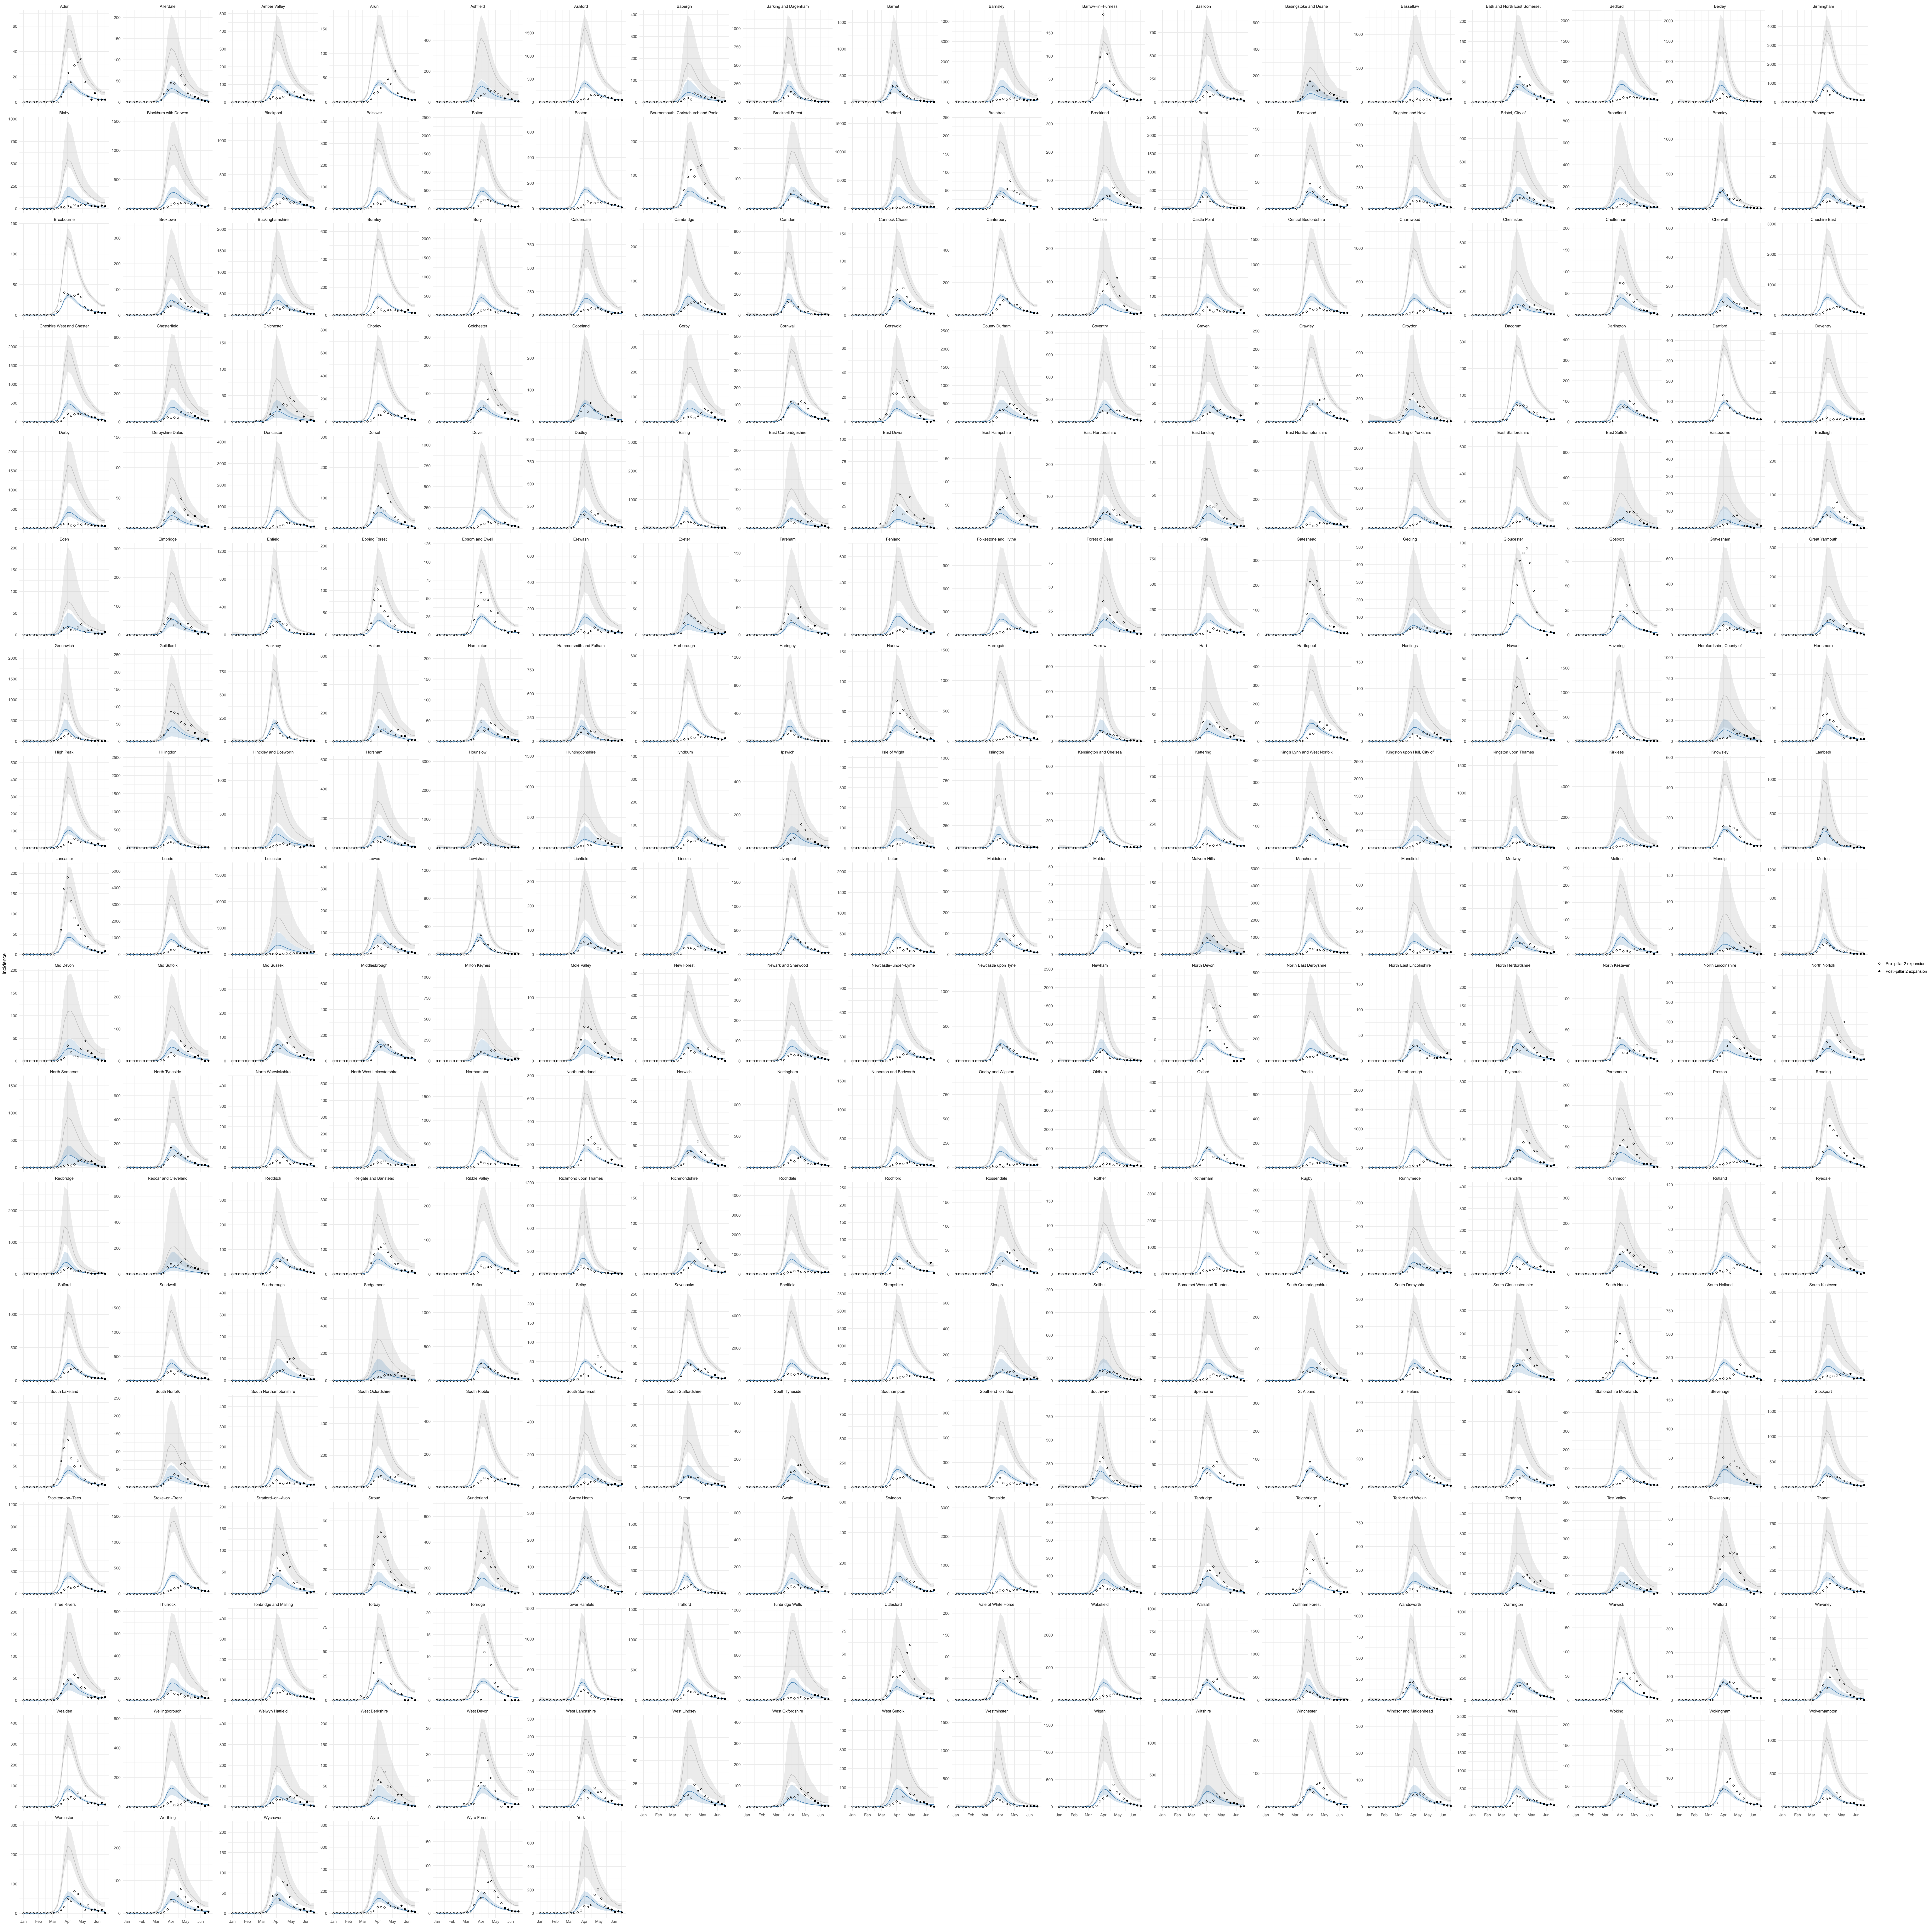

Supplement: MOESM2 [file 20302134]
